# Supplementary material for: New iodate fluoride Rb2Ce(IO3)5F with nonlinear optical properties
Source: Royal Society of Chemistry journal article supplement (doi:10.1039/d4dt00431k), 2024-01-01
Supplement: d4dt00431k1.pdf [file d4dt00431k1.pdf]

## Supporting Information

### **New iodate fluoride $\text{Rb}_2\text{Ce}(\text{IO}_3)_5\text{F}$ with nonlinear optical properties**

Oksana P. Grigorieva<sup>a</sup>, Tatiana B. Shatalova<sup>a</sup>, Alexey N. Kuznetsov<sup>a</sup>, Peter S. Berdonosov<sup>a\*</sup>,  
Sergey Yu. Stefanovich<sup>a</sup>, Konstantin A. Lyssenko<sup>a</sup>, Valery A. Dolgikh<sup>a</sup>

<sup>a</sup> Lomonosov Moscow State University, Moscow 119991, Russia.

\* Corresponding Author: [berdonosov@inorg.chem.msu.ru](mailto:berdonosov@inorg.chem.msu.ru)

Table S1. Atomic coordinates ( $\times 10^4$ ) and equivalent isotropic displacement parameters ( $\text{\AA}^2 \times 10^3$ ) for  $\text{Rb}_2\text{Ce}(\text{IO}_3)_5\text{F}$ .  $U(\text{eq})$  is defined as one third of the trace of the orthogonalized  $U_{ij}$  tensor.

|       | x        | y        | z       | $U(\text{eq})$ |
|-------|----------|----------|---------|----------------|
| Ce(1) | 10000    | 4531(1)  | 6240(1) | 14(1)          |
| Rb(1) | 5000     | 5022(3)  | 3498(1) | 18(1)          |
| Rb(2) | 10000    | -331(3)  | 6034(1) | 18(1)          |
| I(1)  | 7627(1)  | 2487(2)  | 4743(1) | 27(1)          |
| I(2)  | 10000    | 4693(2)  | 8666(1) | 15(1)          |
| I(3)  | 7346(1)  | 2129(1)  | 7315(1) | 14(1)          |
| O(1)  | 8306(11) | -160(20) | 4760(8) | 63(5)          |
| O(2)  | 8751(10) | 3261(13) | 5405(6) | 24(2)          |
| O(3)  | 8443(10) | 2907(12) | 3879(5) | 19(2)          |
| O(4)  | 8760(9)  | 3241(12) | 8596(6) | 20(2)          |
| O(5)  | 10000    | 5549(16) | 7670(7) | 17(3)          |
| O(6)  | 6576(9)  | 1386(12) | 6431(5) | 19(2)          |
| O(7)  | 6684(8)  | 4147(11) | 7313(6) | 19(2)          |
| O(8)  | 8812(8)  | 2589(12) | 6907(6) | 17(2)          |
| F(1)  | 10000    | 6250(13) | 5257(6) | 21(2)          |

Table S2. Anisotropic displacement parameters ( $\text{\AA}^2 \times 10^3$ ) for  $\text{Rb}_2\text{Ce}(\text{IO}_3)_5\text{F}$ . The anisotropic displacement factor exponent takes the form:  $-2p^2[ h^2 a^*^2 U^{11} + \dots + 2 h k a^* b^* U^{12} ]$

|       | $U^{11}$ | $U^{22}$ | $U^{33}$ | $U^{23}$ | $U^{13}$ | $U^{12}$ |
|-------|----------|----------|----------|----------|----------|----------|
| Ce(1) | 14(1)    | 14(1)    | 15(1)    | -1(1)    | 0        | 0        |
| Rb(1) | 18(1)    | 18(1)    | 20(1)    | 0(1)     | 0        | 0        |
| Rb(2) | 18(1)    | 17(1)    | 18(1)    | 0(1)     | 0        | 0        |
| I(1)  | 31(1)    | 35(1)    | 14(1)    | -1(1)    | -2(1)    | -19(1)   |
| I(2)  | 15(1)    | 15(1)    | 14(1)    | 1(1)     | 0        | 0        |
| I(3)  | 15(1)    | 13(1)    | 15(1)    | 1(1)     | 1(1)     | -1(1)    |
| O(1)  | 23(7)    | 139(15)  | 27(7)    | 18(8)    | -7(5)    | -22(9)   |
| O(2)  | 26(6)    | 27(5)    | 20(5)    | 1(4)     | -3(4)    | -10(4)   |
| O(3)  | 22(6)    | 22(5)    | 13(4)    | 0(4)     | 6(4)     | 0(4)     |
| O(4)  | 24(6)    | 19(5)    | 18(4)    | 3(4)     | -2(4)    | -2(4)    |
| O(5)  | 16(7)    | 21(6)    | 14(6)    | 3(5)     | 0        | 0        |
| O(6)  | 21(5)    | 21(5)    | 14(4)    | -4(4)    | 0(3)     | -2(4)    |
| O(7)  | 21(5)    | 13(4)    | 25(5)    | -3(4)    | 0(4)     | 4(4)     |
| O(8)  | 9(5)     | 18(4)    | 23(4)    | -3(4)    | 7(4)     | -1(4)    |
| F(1)  | 28(7)    | 14(5)    | 22(5)    | 3(4)     | 0        | 0        |

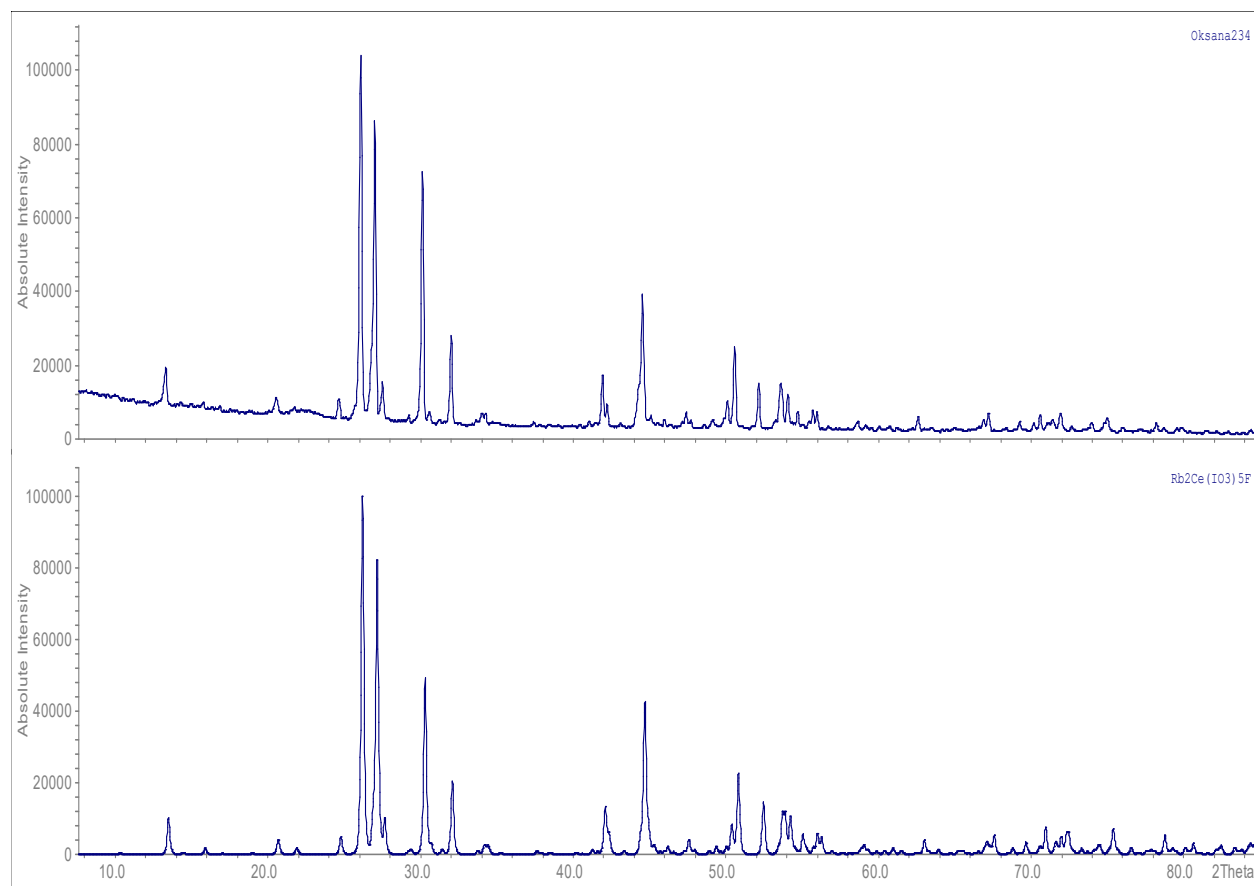

Fig S1. Powder XRD pattern from manually selected orange crystals (upper panel) and simulated pattern from structural refinement of  $\text{Rb}_2\text{Ce}(\text{IO}_3)_5\text{F}$  on single crystal data (low panel)

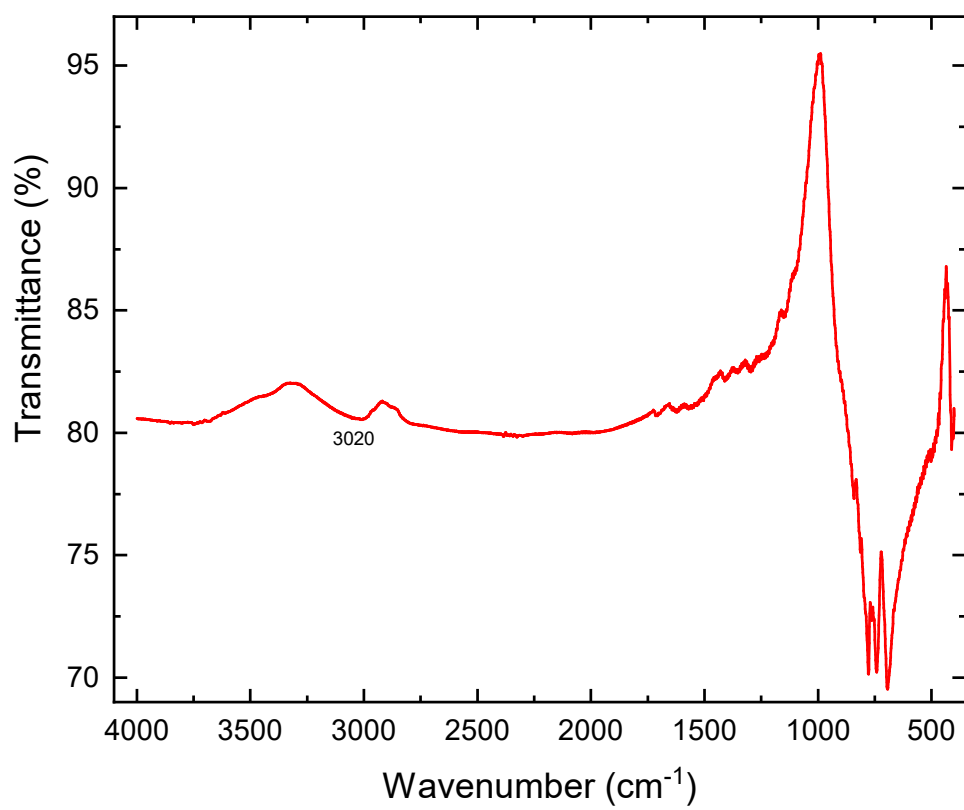

Fig S2. The registered IR spectrum for  $\text{Rb}_2\text{Ce}(\text{IO}_3)_5\text{F}$  crashed crystals 4000-400  $\text{cm}^{-1}$  range
